# Supplementary material for: Examining Influences of Parenting Styles and Practices on Physical Activity and Sedentary Behaviors in Latino Children in the United States: Integrative Review
Source: PubMed Central journal article supplement (PMC5811651; doi:10.2196/publichealth.8159), 2018-01-30
Supplement: publichealth_v4i1e14_app2.pdf [file publichealth_v4i1e14_app2.pdf]

Mutimedia Appendix 2. Quality criteria quantitative studies adapted from [38].

| <b>Quality Criteria: Quantitative Studies</b> |                                                                                                               |                                 |                                       |                                                                                                        |                                             |                                         |
|-----------------------------------------------|---------------------------------------------------------------------------------------------------------------|---------------------------------|---------------------------------------|--------------------------------------------------------------------------------------------------------|---------------------------------------------|-----------------------------------------|
| <b>Studies</b>                                | <b>I. Minimizing selection bias:</b>                                                                          |                                 |                                       |                                                                                                        | <b>II. Minimizing measurement bias:</b>     |                                         |
|                                               | 1. Were study participants well defined (time, place, and personal characteristics for eligibility criteria)? | 2. Was sample selection random? | 3. Was participation rate $\geq 60\%$ | <b>OR</b><br>If participation rate is $< 60\%$ , is there a comparison of respondents/non-respondents? | 4. Did study use a validated questionnaire? | 5. Did the paper report ethical review? |
| <b>Sallis et al. 1993</b>                     | Y                                                                                                             | N                               | Y                                     | Y                                                                                                      | Y                                           | Y                                       |
| <b>Elder et al. 1998</b>                      | Y                                                                                                             | U                               | U                                     | -                                                                                                      | Y                                           | Y                                       |
| <b>Arredondo et al. 2006</b>                  | Y                                                                                                             | N                               | U                                     | -                                                                                                      | N                                           | Y                                       |
| <b>Ayala et al. 2010</b>                      | Y                                                                                                             | N                               | U                                     | N                                                                                                      | Y                                           | Y                                       |
| <b>Elder et al. 2010</b>                      | Y                                                                                                             | N                               | U                                     | -                                                                                                      | N                                           | Y                                       |
| <b>Cong et al. 2011</b>                       | Y                                                                                                             | U                               | U                                     | N                                                                                                      | U                                           | Y                                       |
| <b>O'Connor et al. 2013</b>                   | Y                                                                                                             | N                               | U                                     | U                                                                                                      | Y                                           | Y                                       |
| <b>Crespo et al. 2012</b>                     | Y                                                                                                             | N                               | Y                                     | -                                                                                                      | Y                                           | Y                                       |
| <b>O'Connor et al. 2014a</b>                  | Y                                                                                                             | Y                               | Y                                     | Y                                                                                                      | Y                                           | Y                                       |
| <b>O'Connor et al. 2014b</b>                  | Y                                                                                                             | Y                               | U                                     | U                                                                                                      | Y                                           | Y                                       |
| <b>Cerin et al. 2016</b>                      | Y                                                                                                             | Y                               | U                                     | U                                                                                                      | Y                                           | Y                                       |

Y=yes, N=no, U=uncertain.
