# Supplementary material for: Examining Influences of Parenting Styles and Practices on Physical Activity and Sedentary Behaviors in Latino Children in the United States: Integrative Review
Source: PubMed Central journal article supplement (PMC5811651; doi:10.2196/publichealth.8159), 2018-01-30
Supplement: publichealth_v4i1e14_app3.pdf [file publichealth_v4i1e14_app3.pdf]

Mutimedia Appendix 3: Methodological assessment of qualitative studies [39].

| <b>Qualitative Evaluation Criteria</b>                                                                                                                                                                                                          | <b>Snethen et al. 2007</b> | <b>Lindsay et al. 2009<sup>a</sup></b> | <b>O'Connor et al. 2013</b> | <b>Turner et al. 2014</b> | <b>Grzywacz et al. 2016</b> |
|-------------------------------------------------------------------------------------------------------------------------------------------------------------------------------------------------------------------------------------------------|----------------------------|----------------------------------------|-----------------------------|---------------------------|-----------------------------|
| Was there a clear statement of the aims of the research?                                                                                                                                                                                        | Y                          | Y                                      | Y                           | Y                         | Y                           |
| Was the research design appropriate to address the aims of the research?                                                                                                                                                                        | Y                          | Y                                      | Y                           | Y                         | Y                           |
| Was the recruitment strategy appropriate to the aims of the research? (e.g., How were participants selected? e.g. purposive, convenience, consecutive, snowball?; How were participants approached? e.g. face-to-face, telephone, mail, email?) | Y                          | Y                                      | Y                           | Y                         | Y                           |
| Were data collected in a way appropriate to address the research questions? (e.g., Were questions, prompts, guides provided by the authors? Was it pilot tested? Was data saturation discussed?)                                                | Y                          | Y                                      | Y                           | Y                         | Y                           |
| Has the relationship between researcher and participants been considered?                                                                                                                                                                       | N                          | N                                      | N                           | N                         | N                           |
| Have ethical issues been taken into consideration?                                                                                                                                                                                              | Y                          | Y                                      | Y                           | Y                         | Y                           |
| Was the data analysis sufficiently rigorous?                                                                                                                                                                                                    | U                          | Y                                      | Y                           | Y                         | Y                           |
| Is there a clear statement of findings?                                                                                                                                                                                                         | Y                          | Y                                      | Y                           | Y                         | Y                           |
| Is the research valuable?                                                                                                                                                                                                                       | Y                          | Y                                      | Y                           | Y                         | Y                           |

Y=yes, N=no, U=uncertain.

<sup>a</sup> Study conducted by the same primary author of this review.
