# Supplementary material for: Examining Influences of Parenting Styles and Practices on Physical Activity and Sedentary Behaviors in Latino Children in the United States: Integrative Review
Source: PubMed Central journal article supplement (PMC5811651; doi:10.2196/publichealth.8159), 2018-01-30
Supplement: publichealth_v4i1e14_app4.pdf [file publichealth_v4i1e14_app4.pdf]

Multimedia Appendix 4: Description of studies included in integrative review of parenting styles and practices as mediators of physical activity in Latino children.

| <b>Characteristics</b>                            | <b>No. of Studies</b> |
|---------------------------------------------------|-----------------------|
| <b>Total number of studies selected</b>           | 16                    |
| <b>Publication dates</b>                          |                       |
| Before 2000                                       | 2                     |
| 2000–2005                                         | 0                     |
| 2006–2011                                         | 6                     |
| 2012–2017                                         | 8                     |
| <b>Study design</b>                               |                       |
| Qualitative                                       | 5                     |
| Cross-sectional                                   | 5                     |
| Randomized trial/intervention                     | 6                     |
| <b>Age group</b>                                  |                       |
| 2–5 years                                         | 7                     |
| 4–12 years                                        | 9                     |
| <b>Description of Hispanic/Latino subgroups</b>   |                       |
| Multiethnic, description of Hispanic subgroups    | 3                     |
| Multiethnic, no description of Hispanic subgroups | 1                     |
| Hispanic/Latino only, no subgroup description     | 7                     |
| Hispanic/Latino only, with subgroup description   | 5                     |
