# Supplementary material for: Examining Influences of Parenting Styles and Practices on Physical Activity and Sedentary Behaviors in Latino Children in the United States: Integrative Review
Source: PubMed Central journal article supplement (PMC5811651; doi:10.2196/publichealth.8159), 2018-01-30
Supplement: publichealth_v4i1e14_app5.pdf [file publichealth_v4i1e14_app5.pdf]

Multimedia Appendix 5: Characteristics of studies included in the integrative review.

| Author                     | Method       | Country (State)       | Participants                                                                                                                                                    | Primary Data Collection Method                                                                                                                                   |
|----------------------------|--------------|-----------------------|-----------------------------------------------------------------------------------------------------------------------------------------------------------------|------------------------------------------------------------------------------------------------------------------------------------------------------------------|
| Arredondo et al. 2006 [40] | Quantitative | U.S. (California)     | n = 812; parents; Mexican immigrant/ Mexican-American mothers and K-2nd grade children                                                                          | Self-administered questionnaire                                                                                                                                  |
| Snethen et al. 2007 [41]   | Quantitative | U.S. (Wisconsin)      | n = 36; 12 Mexican- American or Mexican-immigrant fathers, 12 mothers, and 12 children (8 boys and 4 girls) age                                                 | 3 focus groups                                                                                                                                                   |
| Lindsay et al. 2009 [42]   | Qualitative  | U.S. (Massachusetts)  | n = 51; multi-ethnic Latina mothers of preschool-age (2-5 years) children                                                                                       | 6 focus groups (N = 31); 20 in-depth interviews                                                                                                                  |
| Ayala et al. 2010 [43]     | Quantitative | U.S. (California)     | n = 811; predominantly Mexican immigrant/ Mexican-American mothers and K-2nd grade children                                                                     | Self-administered questionnaire                                                                                                                                  |
| Elder et al. 2010 [44]     | Quantitative | U.S. (California)     | n = 745; predominantly Mexican immigrant/ Mexican-American parents and K-2nd grade children                                                                     | Self-administered questionnaire                                                                                                                                  |
| Cong et al. 2012 [45]      | Quantitative | U.S. (Texas)          | n = 416; Hispanic low-income parents and their 5- to 9-year-old children                                                                                        | Self-administered questionnaire                                                                                                                                  |
| Crespo et al. 2012 [46]    | Quantitative | U.S. (California)     | n = 808; predominantly Mexican immigrant/ Mexican-American mothers and K-2nd grade children                                                                     | Self-administered questionnaire                                                                                                                                  |
| O'Connor et al. 2013 [47]  | Qualitative  | U.S. (Texas)          | n = 74; Latino parents or legal guardians of children 3-5 years old                                                                                             | 10 nominal group technique; a structured multi-step group procedure                                                                                              |
| O'Connor et al. 2013 [48]  | Quantitative | U.S. (Texas)          | n = 80; 40 parents and 40 children (82.5% Hispanic) 5- to 8- years old                                                                                          | Interviewer-administered questionnaire                                                                                                                           |
| O'Connor et al. 2014 [49]  | Quantitative | U.S. (Texas)          | n = 240; Latino parents and their 3- to 5-year-old child                                                                                                        | Self-administered questionnaire; accelerometer                                                                                                                   |
| O'Connor et al. 2014 [50]  | Quantitative | U.S. (Texas)          | n = 240; Latino parents (68.7% from Mexico) and their 3- to 5-year-old child                                                                                    | Self-administered questionnaire                                                                                                                                  |
| Turner et al. 2014 [51]    | Qualitative  | U.S. (Texas)          | n = 33; Mexican-American or Mexican immigrant mothers and fathers and their 5- to 12-year-old children                                                          | 12 focus groups                                                                                                                                                  |
| Cerin et al. 2016 [52]     | Quantitative | U.S. (Texas)          | n = 84; Latino parents (74% from Mexico) and children 3-5 years                                                                                                 | Self-administered questionnaire; accelerometer                                                                                                                   |
| Grzywacz et al. 2016 [53]  | Qualitative  | U.S. (North Carolina) | n = 33; Latino farmworker mothers of preschool-age (2-5 years) children                                                                                         | 33 in-depth interviews                                                                                                                                           |
| Sallis et al. 1993 [54]    | Quantitative | U.S. (California)     | n = 387; Anglo-American (n=146) and Mexican-American (n=241) parents and their 4 year-old children                                                              | Direct observations using the Behaviors of Eating and Physical Activity for Child Health: Evaluation System (BEACHES) and interviewer-administered questionnaire |
| Elder et al. 1998 [55]     | Quantitative | U.S. (California)     | n = 291; parents; Anglo-American(n=178) and Mexican-American (n=113) parents and their children 4 years (Measurement Wave 1) and 6.5 years (Measurement Wave 2) | Direct observations using the BEACHES                                                                                                                            |
