# Supplementary material for: Examining Influences of Parenting Styles and Practices on Physical Activity and Sedentary Behaviors in Latino Children in the United States: Integrative Review
Source: PubMed Central journal article supplement (PMC5811651; doi:10.2196/publichealth.8159), 2018-01-30
Supplement: publichealth_v4i1e14_app6.pdf [file publichealth_v4i1e14_app6.pdf]

Multimedia Appendix 6: Synthesis of results of studies included in integrative review.

| Category                   | Themes                           | Factors That Encourage/Facilitate/Increase or Discourage/Hinder/Decrease Children's Physical Activity                                         |
|----------------------------|----------------------------------|-----------------------------------------------------------------------------------------------------------------------------------------------|
| <b>Parenting Styles</b>    |                                  |                                                                                                                                               |
|                            | Permissive                       | (-/+ ) not setting limits (e.g., allowing child unrestricted TV-viewing and/or other screen time)                                             |
|                            | Authoritative                    | (+) setting expectations, but willing to negotiate                                                                                            |
|                            | Authoritative                    | (-) dictating what the child does                                                                                                             |
| <b>Parenting Practices</b> |                                  |                                                                                                                                               |
|                            | Engagement and Involvement       | (+) participating in PA with child; being involved in child's activities (e.g., coaching a sport)                                             |
|                            | Verbal Encouragement             | (+) praising child for being physically active                                                                                                |
|                            | Prompting                        | (+) prompting child to be physically active by providing verbal or nonverbal encouragement for the child to engage in physical activity       |
|                            | Motivational Support             | (+) praising child for participating in PA                                                                                                    |
|                            | Logistic or Instrumental Support | (+) providing transportation; enrolling child in PA classes and sports; taking child to park, etc.                                            |
|                            | Limit Setting                    | (+) setting limit on screen time                                                                                                              |
|                            | Monitoring                       | (+) monitoring screen time use/monitoring physical activity                                                                                   |
|                            | Reinforcement and Rewards        | (+) providing positive reinforcement or rewarding child for being physically active or for good performance in sports                         |
|                            | Rules and Restrictions           | (-) having rules and restricting outdoor play due to safety concerns (neighborhood safety, traffic, weather, etc.) or weather-related reasons |
|                            | Discipline                       | (0) disciplining child for watching TV or videos, playing video games or the computer                                                         |
|                            | Psychological Control            | (-) parental criticism, intimidation, and insults; manipulation of child's behavior to satisfy parents' needs                                 |

(+) indicates encourages, facilitates, or increases physical activity; (-) indicates discourages, hinders, or decreases physical activity; (0) indicates no association with children's physical activity.
